# Supplementary material for: White light upconversion in Yb-sensitized (Tm, Ho)-doped KLu(WO4)2nanocrystals: the effect of Eu incorporation
Source: Royal Society of Chemistry journal article supplement (doi:10.1039/c3cp53847h), 2013-11-05
Supplement: c3cp53847h.pdf [file c3cp53847h.pdf]

## Electronic Supplementary Information

### White light upconversion in (Ho,Tm,Yb):KLu(WO<sub>4</sub>)<sub>2</sub> nanocrystals

E.W. Barrera<sup>a</sup> M.C. Pujol<sup>b,\*</sup> J.J. Carvajal<sup>a</sup>, X. Mateos<sup>a</sup>, R.M. Solé<sup>a</sup>, J. Massons<sup>a</sup>, A. Speghini<sup>b</sup>, M. Bettinelli<sup>b</sup>, C. Cascales<sup>c</sup>, M. Aguiló<sup>a</sup>, F. Díaz<sup>a</sup>.

<sup>a</sup> Física i Cristal·lografia de Materials i Nanomaterials (FiCMA-FiCNA)-EMAS, Universitat Rovira i Virgili (URV), Campus Sescelades, c/ Marcel·lí Domingo, s/n, E-43007 Tarragona, Spain

<sup>b</sup> Laboratorio di Chimica dello Stato Solido, Dipartimento di Biotecnologie, Università di Verona and INSTM, UdR Verona, Ca' Vignal, Strada Le Grazie 15, 37134 Verona, Italy

<sup>c</sup> Instituto de Ciencia de Materiales de Madrid, CSIC, calle Sor Juana Inés de la Cruz, Cantoblanco, E-28049 Madrid, Spain

\* corresponding author: mariacinta.pujol@urv.cat

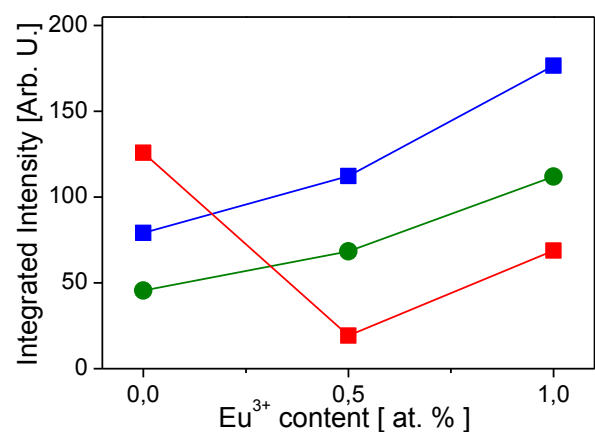

Figure S1. Dependence of the emission intensities with Eu<sup>3+</sup> content. Excitation power corresponds to 354 W/cm<sup>2</sup>.

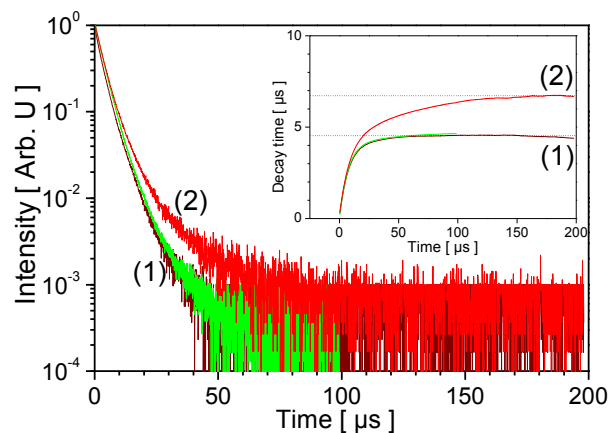

Figure S2. Photoluminescence decay of Ho<sup>3+</sup> <sup>5</sup>S<sub>2</sub> (1) and <sup>5</sup>F<sub>5</sub> (2) multiplets after 460 nm excitation for 1 % Ho, 10 % Yb:KLuW nanocrystals (T0H1Y10 sample). The inset shows the convergence of decay time value.

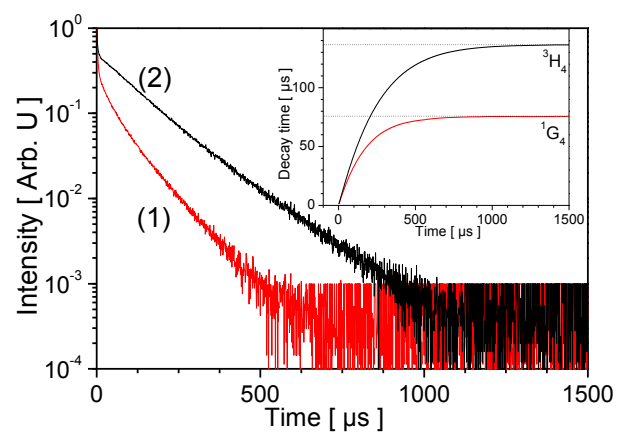

Figure S3. RT photoluminescence decay of  $^1G_4$  (1) and  $^3H_4$  (2) multiplets to the ground state after 460 nm excitation for 1 % Tm, 10 % Yb:KLuW nanocrystals (T1H0Y10 sample). The inset shows the convergence towards decay time value.

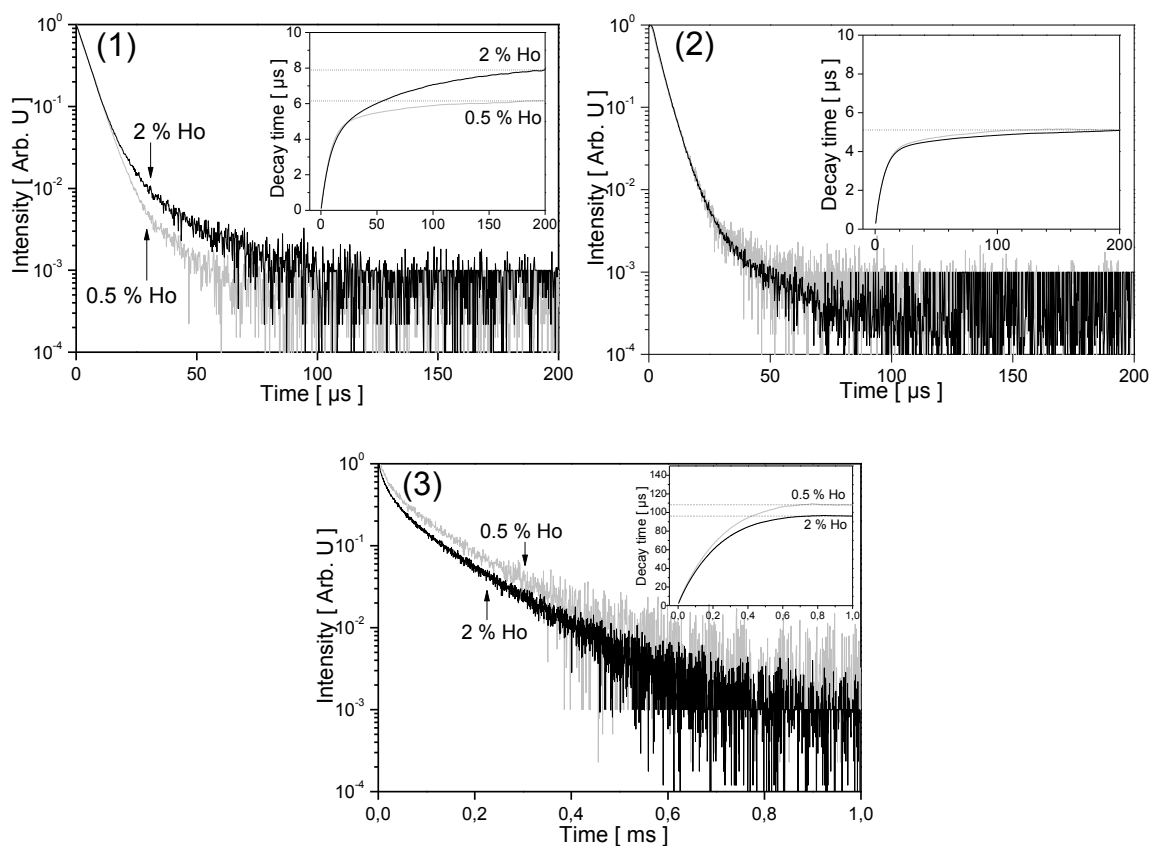

Figure S4. RT photoluminescence decay of  $^5S_2, ^5F_4 \rightarrow ^5I_8$  (1),  $^5F_5 \rightarrow ^5I_8$  (2) and  $^3H_4 \rightarrow ^3H_6$  (3) transitions in  $\text{Ho}^{3+}$  doped 1 % Tm, 1 % Yb: KLuW nanocrystals (T0.5H1Y1 and T2H1Y1 samples) The inset shows in each case the convergence of the decay time value.

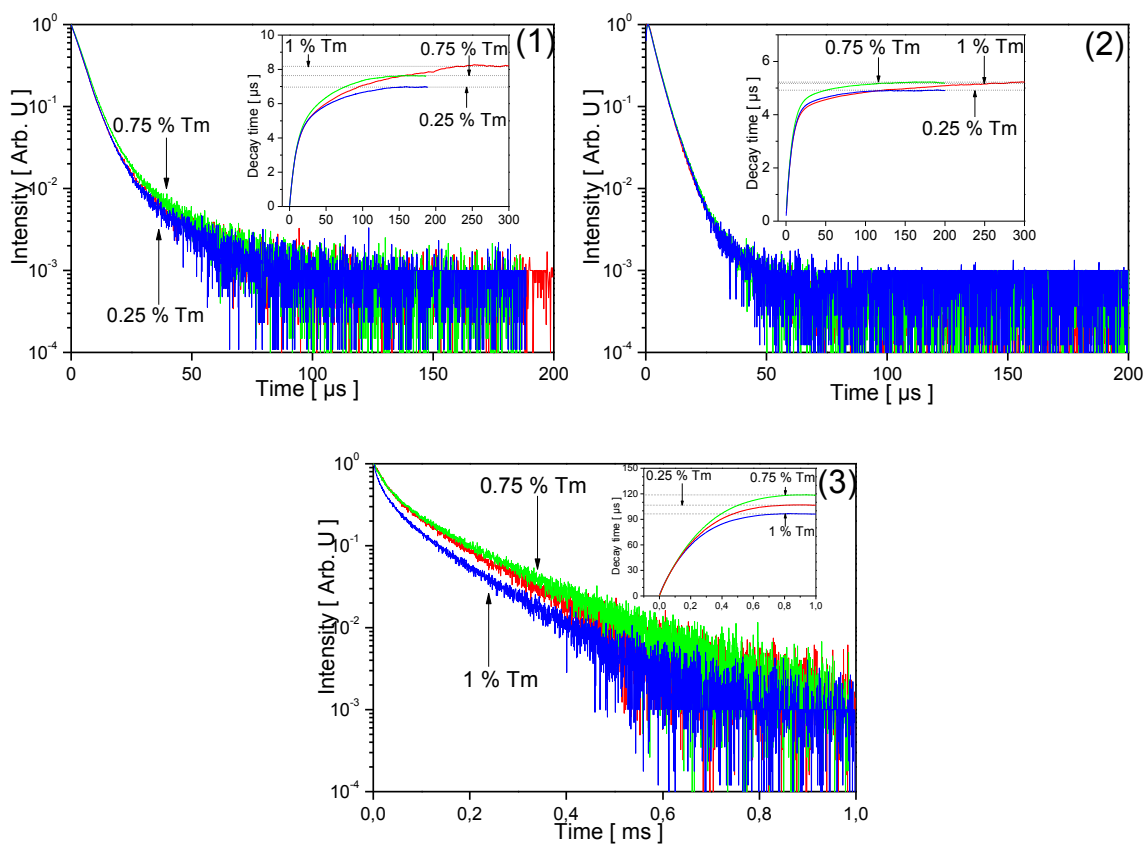

Figure S5. RT photoluminescence decay observed for the  $^5S_2, ^5F_4 \rightarrow ^5I_8$  (1),  $^5F_5 \rightarrow ^5I_8$  (2) and  $^3H_4 \rightarrow ^3H_6$  (3) transitions after 460 nm excitation in Tm<sup>3+</sup> doped 2 % Ho, 1 % Yb:KLuW nanocrystals (T0.25H2Y1, T0.75H2Y1 and T1H2Y1 samples). The insets show the convergence of the decay time value.

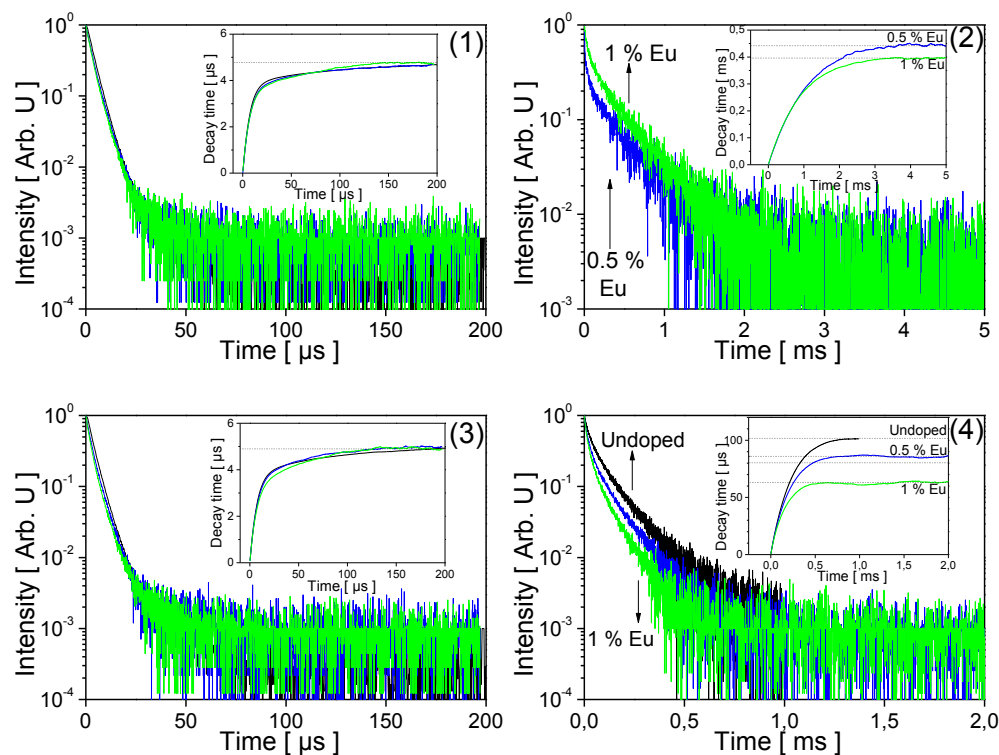

Figure S6. Room temperature photoluminescence decay of  $\text{Ho}^{3+} \ ^5\text{S}_2, \ ^5\text{F}_4 \rightarrow \ ^5\text{I}_8$  (1),  $\text{Eu}^{3+} \ ^5\text{D}_0 \rightarrow \ ^7\text{F}_2$  (2)  $\text{Ho}^{3+} \ ^5\text{F}_5 \rightarrow \ ^5\text{I}_8$  (3) and  $\text{Tm}^{3+} \ ^3\text{H}_4 \rightarrow \ ^3\text{H}_6$  (4) transitions in  $\text{Eu}^{3+}$  doped 1 % Tm, 2 % Ho, 1 % Yb:KLuW nanocrystals (T1H2Y1, T1H2E0.5Y1 and T1H2E1Y1 samples). The insets show the convergence of decay time value.
